# Supplementary material for: Knowledge and attitude towards COVID-19 and associated factors among health care providers in Northwest Ethiopia
Source: PubMed Central journal article supplement (PMC7454942; doi:10.1371/journal.pone.0238415), 2020-08-28
Supplement: pone.0238415.s002.pdf [file pone.0238415.s002.pdf]

Knowledge and attitude towards COVID-19 and associated factors among health care providers  
in Northwest Ethiopia

**Part -I Question to assess Socio-economic information**

**Instructions:** Write your response on the space provided for open ended questions and Encircle your Response for close ended questions.

| S.No. | Questions                                | Options                                                                                                              |
|-------|------------------------------------------|----------------------------------------------------------------------------------------------------------------------|
| 101   | Type of Health facility you are working? | 1. Hospital<br>2. Health center                                                                                      |
| 102   | Age                                      | _____years                                                                                                           |
| 103   | Sex                                      | 1. Male<br>2. Female                                                                                                 |
| 104   | Profession                               | 1. Physician<br>2. Nurse<br>3. Midwife<br>4. Health officer<br>5. Pharmacy<br>6. Laboratory<br>7. Other(specify)---- |
| 105   | Level of Education                       | 1. Diploma<br>2. Bachelor Degree<br>3. Masters Degree<br>4. Other _____                                              |
| 106   | Years of experience                      | _____years                                                                                                           |
| 107   | Marital status                           | 1. Single<br>2. Married<br>3. Divorced<br>4. Separate<br>5. Widowed                                                  |
| 108   | Ethnicity                                | 1. Amahra<br>2. Oromo<br>3. Qimant<br>4. Tigray<br>5. Other (Specify).....                                           |
| 109   | Religion                                 | 1. Orthodox<br>2. Muslim<br>3. Protestant<br>4. Other (specify).....                                                 |

**Part II: Questionnaire of knowledge, and attitudes towards COVID-19**

| <b>Section II. Knowledge, please respond to the following questions</b> |                                                                                        |                                                                                                                                                                                      |
|-------------------------------------------------------------------------|----------------------------------------------------------------------------------------|--------------------------------------------------------------------------------------------------------------------------------------------------------------------------------------|
| S.no                                                                    | Questions                                                                              | Options                                                                                                                                                                              |
| 201                                                                     | Did you ever heard about COVID-19                                                      | 1. Yes<br>2. No                                                                                                                                                                      |
| 202                                                                     | What was your source of information about Covid-19? (more than one answer is possible) | 1. News media (TV, Radio)<br>2. Social media (FB, Telegram etc)<br>3. From facility coworkers<br>4. Family and friends<br>5. Websites of FMOH, WHO, CDC etc<br>6. Other specify..... |
| 203                                                                     | Covid-19 is a viral infection                                                          | 7. Yes<br>8. No<br>9. Don't know                                                                                                                                                     |
| 204                                                                     | The incubation period of Covid-19 is?                                                  | 1. 24 hours<br>2. 1-5 days<br>3. 2-14 days<br>4. Don't know                                                                                                                          |
| 205                                                                     | How long is the quarantine period for COVID-19 suspect?                                | 1. 1 week<br>2. 2 weeks<br>3. 3 weeks<br>4. weeks                                                                                                                                    |
| 206                                                                     | Asymptomatic persons with COVID-19 can transmit the disease to other people            | 1. Yes<br>2. No<br>3. 3. I don't know                                                                                                                                                |
| 207                                                                     | Health care workers are at higher risk of infection?                                   | 1. Yes<br>2. No<br>3. Don't know                                                                                                                                                     |
| 208                                                                     | Which group of population can be infected by COVID-19?                                 | 1. Adults<br>2. Children<br>3. Elderly<br>4. All can be infected                                                                                                                     |
| 209                                                                     | COVID-19 has an air born transmission?                                                 | 1. Ye<br>2. No.<br>3. Not clearly defined<br>4. I don't know                                                                                                                         |
| 210                                                                     | Covid-19 is transmitted via respiratory droplets?                                      | 1. Yes                                                                                                                                                                               |

|     |                                                                                                    |                                                                                                                                                                                                                                                                                                                               |
|-----|----------------------------------------------------------------------------------------------------|-------------------------------------------------------------------------------------------------------------------------------------------------------------------------------------------------------------------------------------------------------------------------------------------------------------------------------|
|     |                                                                                                    | <ul style="list-style-type: none"> <li>2. No</li> <li>3. Don't know</li> </ul>                                                                                                                                                                                                                                                |
| 211 | The following practices can help to protect you from COVID-19?<br>(check all that can apply)       | <ul style="list-style-type: none"> <li>1. Washing your hands with soap/use hand sanitizers frequently</li> <li>2. Covering your nose with your hands during sneezing</li> <li>3. Wearing a face mask</li> <li>4. Keeping physical distance</li> <li>5. Staying at home/avoid crowds</li> <li>6. Other specify.....</li> </ul> |
| 212 | What are the possible typical symptoms of Covid-19? (check all that can apply)                     | <ul style="list-style-type: none"> <li>1. Fever</li> <li>2. Dry cough</li> <li>3. Sore throats</li> <li>4. Shortness of breath</li> <li>5. fatigue</li> <li>6. myalgia</li> <li>7. Others specify .....</li> </ul>                                                                                                            |
| 213 | How do you confirm diagnosis of COVID-19 by?                                                       | <ul style="list-style-type: none"> <li>1. Nasopharyngeal/Throat swab</li> <li>2. CXR</li> <li>3. Blood sample</li> <li>4. Stool sample</li> </ul>                                                                                                                                                                             |
| 214 | Most common form of severity of presentation for COVID -19 patients is?                            | <ul style="list-style-type: none"> <li>1. Mild</li> <li>2. Severe</li> <li>3. Critical</li> </ul>                                                                                                                                                                                                                             |
| 215 | COVID -19 could be fatal                                                                           | <ul style="list-style-type: none"> <li>1. Yes</li> <li>2. No</li> <li>3. Don't know</li> </ul>                                                                                                                                                                                                                                |
| 216 | Risk of infection and death from COVID-19 is higher among patients with underlying chronic illness | <ul style="list-style-type: none"> <li>1. Yes</li> <li>2. No</li> <li>3. I don't know</li> </ul>                                                                                                                                                                                                                              |
| 217 | Are there specific vaccines to prevent Coronavirus disease (COVID-19)?                             | <ul style="list-style-type: none"> <li>1. Yes</li> <li>2. No</li> <li>3. I don't know</li> </ul>                                                                                                                                                                                                                              |
| 218 | Are antibiotics effective in preventing and treating Corona virus disease (COVID-19) ?             | <ul style="list-style-type: none"> <li>1. Yes</li> <li>2. No</li> <li>3. I don't know</li> </ul>                                                                                                                                                                                                                              |

|                                                                          |                                                                                                                               |                                                                                                  |
|--------------------------------------------------------------------------|-------------------------------------------------------------------------------------------------------------------------------|--------------------------------------------------------------------------------------------------|
| 219                                                                      | Are there specific medicines to treat Corona virus disease (COVID-19) as of today?                                            | <ol style="list-style-type: none"> <li>1. Yes</li> <li>2. No</li> <li>3. Not sure</li> </ol>     |
| 220                                                                      | Symptomatic and supportive care is the current treatment for covid -19?                                                       | <ol style="list-style-type: none"> <li>1. Yes</li> <li>2. No</li> <li>3. I don't know</li> </ol> |
| <b>Section III. Attitudes, please respond to the following questions</b> |                                                                                                                               |                                                                                                  |
| 301                                                                      | Do you believe that COVID-19 will finally be successfully controlled?                                                         | <ol style="list-style-type: none"> <li>1. Yes</li> <li>2. No</li> <li>3. I don't know</li> </ol> |
| 302                                                                      | Do you think Hand Hygiene is important in controlling the spread COVID-19                                                     | <ol style="list-style-type: none"> <li>1. Yes</li> <li>2. No</li> <li>3. I don't know</li> </ol> |
| 303                                                                      | Do you think wearing masks is important in controlling the spread covid -19                                                   | <ol style="list-style-type: none"> <li>1. Yes</li> <li>2. No</li> <li>3. I don't know</li> </ol> |
| 304                                                                      | Do you think you may probably get infected with covid -19?                                                                    | <ol style="list-style-type: none"> <li>1. Yes</li> <li>2. No</li> <li>3. No sure</li> </ol>      |
| 305                                                                      | If you get infected with Covid -19 will you accept isolation in health facilities?                                            | <ol style="list-style-type: none"> <li>1. Yes</li> <li>2. No</li> </ol>                          |
| 306                                                                      | Do you fear that you may transmit COVID-19 to your family members?                                                            | <ol style="list-style-type: none"> <li>1. Yes</li> <li>2. No</li> </ol>                          |
| 307                                                                      | Do you think that every health care worker working at a COVID-19 treatment center need to be quarantined though asymptomatic? | <ol style="list-style-type: none"> <li>1. Yes</li> <li>2. No</li> </ol>                          |
| 308                                                                      | Are you interested to be involved in the treatment of Covid-19 patients?                                                      | <ol style="list-style-type: none"> <li>1. Yes</li> <li>2. No</li> </ol>                          |
| 309                                                                      | Sick patients should share their recent travel history for their health care providers?                                       | <ol style="list-style-type: none"> <li>1. Yes</li> <li>2. No</li> </ol>                          |
| 310                                                                      | Do you have confidence that Ethiopia can win the battle against the COVID-19 virus?                                           | <ol style="list-style-type: none"> <li>1. Yes</li> <li>2. No</li> <li>3. I don't know</li> </ol> |
| 311                                                                      | Do you think the government of Ethiopia is doing enough to prevent and control Corona virus disease (COVID-19) outbreak?      | <ol style="list-style-type: none"> <li>1. Yes</li> <li>2. No</li> <li>3. Not sure</li> </ol>     |
